# Supplementary material
Source: PubMed Central journal article supplement (PMC7586907)
Supplement: PRO-29-2213-s001.pdf [file PRO-29-2213-s001.pdf]

ATGGACAATGTGGACTTCGCGGAAAGCGTGCGTACCCGTTGGGCCCGTCGCCTGATTCGT  
GAAAAGGTTGCTAAGGAACTGAACATCCTGACCGAACGCCTGGGTGAAGTCCGGGTATT  
CCGCCGCCGCGCGAAGGTCGTTTCCTGGGTGGCGGCTACTCACACGACAACCTGCCGAGC  
GATCCGCTGTATTCCAGCATTAAACCGGCACCTGCTGAAAGAAGCCCGCGTGCCGAAGAA  
GAACTGCCGCCGCGCAAAGTCTGTATCGTTGGTGC GGTTGTGAGCGGTCTGTATATTGCC  
ATGATTCTGGATGATCTGAAAATCCCGAATCTGACCTACGACATCTTCGAATCGAGCTCA  
CGTACCGGCGGTTCGTCTGTATACGCACCATTTTACCGATGCGAAGCACGATTATTACGAT  
ATCGGTGCAATGCGTTACCCGGACATCCCGTCAATGAAACGTACCTTCAACCTGTTTAAAG  
CGCACCGGTATGCCGCTGATTAAATATTACCTGGACGGTGAAAATACCCCGCAACTGTAT  
AACAAATCACTTCTTTGCGAAAGGCGTGGTGGATCCGTACATGGTGTCCGGTTGCGAATGGC  
GGTACCGTGCCGGATGATGTGGTTGATTTCAGTCCGTGAAAAGCTGCAGCAAGCATTGGT  
TATTACAAAGAAAACCTGGCTGAAGATTTTCGACAAGGGCTTTGATGAACTGATGCTGGTT  
GATGACATGACGACCCGCGAATATCTGAAACGCGGTGGCCCGAAAGGTGAAGCGCCGAAA  
TACGATTTCTTCGCGATTCAGTGGATGGAAACCCAAAACACGGGTACCAACCTGTTGAC  
CAAGCATTCTCGAATCAGTGATTGATAGCTTCGATTTTGTACAATCCGACCAAGCCGGAA  
TGGTACTGCATCGAAGGCGGTACCAGCCTGCTGGTGCAGCGCAATGAAAGAAACGCTGGTC  
CATAAAGTGCAGAACAAATAAGCGCGTTCGAAGCCATTAGCATCGATCTGGACGCACCGGAT  
GATGGTAACATGTCAGTGAAAATTTGGCGGTAAAGACTACAGCGGTACAGCACCCTGTTT  
AACACCACCGCTCTGGGTTGCCTGGACCGTATGGATCTGCGTGGCCTGAATCTGCACCCG  
ACCCAAGCAGATGCGATTGCTGTCTGCACTACGATAATTCGACGAAAGTTGCGCTGAAA  
TTTAGCTACCCGTGGTGGATCAAAGATTGCGGCATTACCTGTGGCGGTGCGGCATCGACC  
GATCTGCCGCTGCGTACCTGTGTGTACCCGAGCTACAACCTGGGCGATACGGGTGAAGCA  
GTGCTGCTGGCCAGTTACACCTGGTCCCAAGATGCAACGCGCATTGGTTCCCTGGTCAAG  
GATGCGCCGCCGCGAGCCGCCGAAAGAAGACGAACTGGTCGAACTGATCCTGCAGAACCTG  
GCACGCCTGCACGCAAGACACATGACCTATGAAAAGATCAAGGAAGCGTACACCGGTGTG  
TATCACGCATATTGTTGGGCAAAATGACCCGAACTCGGCGGTGCTTTTGCCCTGTTGGT  
CCGGGCCAATTCAGCAATCTGTACCCGTATCTGATGCGCCCGGCAGCAGGTGGCAAGTTT  
CATATCGTGGGTGAAGCGTTCGAGCGTGCATCACGCATGGATCATTGGTTTCGCTGGAATCA  
GCATATACCGCAGTGTATCAGTTTCTGTACAAATATAAAGATGTGGGATTACCTGCTCTG  
CTGCTGGAACGTTGGCAGTATGGCCTGCAGGAAGTGAACCGGTAAACACGGCACCGCA  
CACCTGCAATTTATCCTGGGCTCGCTGCCGAAAGAATACCAAGTGAAGATTTGA

**Fig. S1.** The nucleotide sequence of the codon-optimized gene of *LysOX*, *lysox3*. The substituted nucleotides are shown in red.
